# Supplementary material
Source: publisher site journal article supplement (https://www.dovepress.com/article/454985)
Supplement: Supplementary file 1 [file get_supplementary_file.php]

**Supplementary Material**

**Supplementary Table 1.** Complete Search Strategies **(**Date: 13/ 2/ 2023)

| **Database** | **SinoMed** | |
| --- | --- | --- |
| **Set #** | Search Terms | Number |
| **1** | ("Elderly" [unweighted: extended] OR ("Elderly" [common field: intelligent] OR "60 years old" [common field: intelligent] OR "65 years old" [common field: intelligent] OR "Elderly" [common field: intelligent] OR "advanced age" [common field: intelligent]) | 1352739 |
| **2** | ("Disability" [Common field: Intelligence] OR "Blindness and Deafness Disorder" [Common field: Intelligence] OR "Blindness and Deafness" [Common field: Intelligence] OR "Deafness Blind Syndrome" [Common field: Intelligence] OR "Deafness Blind Disorder" [Common field: Intelligence] OR "Deafness and Blindness Disorder" [Common field: Intelligence] OR "Hearing and Vision Loss" [Common field: Intelligence] OR "Pre lingual Deafness Blind Disorder" [Common field: Intelligence] OR "Pre lingual Deafness Blind" [Common Fields: Intelligence] OR "Vision and Hearing Loss" [Common Fields: Intelligence] OR "Deaf" [Common Fields: Intelligence] OR "Hearing Impaired" [Common Fields: Intelligence] OR "Blind" [Common Fields: Intelligence] OR "Mental Disability" [Common Fields: Intelligence] OR "Mental Illness" [Common Fields: Intelligence] OR "Mental Disability" [Common Fields: Intelligence] OR "Disabled" [Common Fields: Intelligence] OR "Disabled" [Common Fields: Intelligence] OR (Disabled " [Unweighted: expanded] OR "health service for the disabled" [unweighted: expanded] OR "amputee" [unweighted: expanded] OR "hearing impaired" [unweighted: expanded] OR "visually impaired" [unweighted: expanded] OR "mentally disabled" [unweighted: expanded] OR "blind" [unweighted: expanded] OR "deaf" [unweighted: expanded] OR "mental retardation" [unweighted: expanded] OR "Speech and language impairment" [unweighted: expanded] OR "aphasia" [unweighted: expanded]) | 248495 |
| **3** | Health service demand "[unweighted: expanded] OR" healthcare demand "[common field: intelligent] OR" nursing demand "[common field: intelligent] OR" nursing need "[common field: intelligent] OR" nursing support "[common field: intelligent] OR" nursing help "[common field: intelligent] OR" healthcare service demand "[common field: intelligent] OR" community service demand "[common field: intelligent] OR" home demand "[common field: intelligent] | 85461 |
| **4** | #1 and #2 and #3 | 581 |
| **Database** | **CNKI** | |
| **Set #** | Search Terms | Number |
| **1** | Elderly+elderly+60+65+elderly+elderly | 927019 |
| **2** | Nursing needs+nursing needs+nursing support+nursing assistance+health service needs+healthcare needs+healthcare service needs+community service needs+home needs | 13821 |
| **3** | Blindness and Deafness Disorder+Blindness and Deafness+Deafness and Blindness Syndrome+Deafness and Blindness Disorder+Deafness and Blindness Disorder+Hearing and Vision Loss+Pre lingual Deafness and Blindness Disorder+Pre lingual Deafness and Blindness+Vision and Hearing Loss+Deaf+Hearing Impaired+Blind+Mental Disability+Mental Disability+Disabled+Disability+Disability Health Services+amputees+Hearing Impaired+Vision Impaired+Mental Disability+Blindness+Deafness+Intellectual Disability+Speech Obstacle+aphasia+disability | 214458 |
| **4** | #1 and #2 and #3 | 511 |
| **Database** | **WanFang** | |
| **Set #** | Search Terms | Number |
| **1** | Title or Keyword: (Elderly OR 60 Years OR 65 Years OR Elderly OR Older) or Abstract: (Elderly OR 60 Years OR 65 Years OR Elderly OR Older) | 1429428 |
| **2** | Title or Keyword: (Nursing Needs OR Nursing Needs OR Nursing Support OR Nursing Assistance OR Health Service Needs OR Healthcare Needs OR Healthcare Service Needs OR Community Service Needs OR Home Needs) OR Summary: (Nursing Needs OR Nursing Needs OR Nursing Support OR Nursing Assistance OR Health Service Needs OR Healthcare Needs OR Healthcare Service Needs OR Community Service Needs OR Home Needs) | 285175 |
| **3** | (((Title or Keyword: (Disability OR Blindness Disorder OR Blindness Deafness OR Deafness Syndrome OR Deafness Blind Disorder OR Deafness Mute Blind Disorder OR Deafness Blind Disorder OR Hearing and Vision Loss OR Prelingual Deafness Blind Disorder) or Abstract: (Disability OR Blindness Disorder OR Blindness Deafness Deafness Syndrome OR Deafness Blind Disorder OR Deafness Blind Disorder OR Hearing and Vision Loss OR Prelingual Deafness Blind Disorder) or Title or Keyword: (Pre lingual Deafness, Blindness, Visual and Hearing Loss, Deaf, Hearing Impaired, Blind, Mental Disability, Mental Disability, or Disabled) or Abstract: (Pre lingual Deafness, Blindness, Visual and Hearing Loss, Deaf, Hearing Impaired, Blind, Mental Disability, Mental Illness, Mental Disability, or Disabled) or Title or Keyword: (Health services for the disabled OR amputees OR hearing impaired OR visually impaired OR mentally disabled OR blind OR deaf OR intellectual disability OR Speech and language impairment OR aphasia) or abstract: (health services for the disabled OR amputees OR hearing impaired OR visually impaired OR mentally disabled OR deaf OR intellectual disability OR Speech and language impairment OR aphasia)) | 693679 |
| **4** | #1 and #2 and #3 | 1854 |
| **Database** | **VIP** | |
| **Set #** | Search Terms | Number |
| **1** | M=(Elderly OR 60 years old OR 65 years old OR advanced age OR older age) or R=(Elderly OR 60 years old OR 65 years old OR advanced age OR older age) | 963131 |
| **2** | M=(Nursing needs OR Nursing needs OR Nursing support OR Nursing assistance OR Health service needs OR Healthcare needs OR Healthcare service needs OR Community service needs OR Home needs) OR R=(Nursing needs OR Nursing needs OR Nursing support OR Nursing assistance OR Health service needs OR Healthcare needs OR Community service needs OR Home needs) | 104217 |
| **3** | M=(Disability OR Blindness Disorder OR Blindness Deafness OR Deafness Syndrome OR Deafness Blindness Disorder OR Deafness Blindness Disorder OR Deafness Blindness Disorder OR Hearing and Vision Loss OR Prelingual Deafness Blindness Disorder) or R=(Disability OR Blindness Disorder OR Blindness Blindness or Blindness or Blindness or Hearing and Vision Loss OR Prelingual Deafness Blindness Disorder) or M= (Pre lingual Deafness, Blindness, Visual and Hearing Loss, Deaf Person, Hearing Impaired Person, Blind Person, Mental Disability, Disabled Person, or Disabled Person) or R=(Pre lingual Deafness, Blindness, Visual and Hearing Loss, Deaf Person, Hearing Impaired Person, Blind Person, Mental Disability, Mental Illness, Mental Disability, Disabled Person, or Disabled Person) or M= (Health service for the disabled OR amputee OR hearing impaired OR vision impaired OR mental disabled OR blind OR deaf OR intellectual disabled OR Speech and language impairment OR aphasia) or R=(health service for the disabled OR amputee OR hearing impaired OR vision impaired OR mental disabled OR blind OR deaf OR intellectual disabled OR Speech and language impairment OR aphasia) | 157419 |
|  | #1 and #2 and #3 | 1225 |
| **Database** | **Web of science** | |
| **Set #** | Search Terms | Number |
| **1** | TS=“Care Demand*” OR TS=“Health Demand*” OR TS=“Nursing Demand*” OR TS=“social Demand*” OR TS=“Care need*” OR TS=“Service need*” OR TS=“Social need*” OR TS=“Health need*” OR TS=“Nursing need*” OR TS=“unmet need*” OR TS=“health priorit*” OR TS=“Nursing priorit*” OR TS=“Care priorit*” OR TS=“requirement*” OR TS=“Care support*” OR TS=“Health support*” OR TS=“Nursing support*” OR TS=“social support*” OR TS=“Care requirement*” OR TS=“Health requirement*” OR TS=“Nursing requirement*” OR TS=“social requirement*” OR TS=“Health Services Needs and Demand” OR TS=“Craving” OR TS=“Help-Seeking Behavior” | 2631281 |
| **2** | TS="elderly" OR TS="old" OR TS="Centenarians" OR TS="Octogenarians" OR TS="Frail Elders" OR TS="Aged" OR TS="Frail Elderly" OR TS=”Older adults” | 8005521 |
| **3** | (TS="Disabled Person" OR TS="Handicapped" OR TS="People with Disabilities" OR TS="People with Disability" OR TS="Persons with Disabilities" OR TS="Persons with Disability" OR TS="Physically Handicapped" OR TS="Physically Disabled" OR TS="Physically Challenged" OR TS="Intellectual Disability" OR TS="Mentally Retarded" OR TS="Hearing Impaired Persons" OR TS="Hearing Impaired Person" OR TS="Hearing Disabled" OR TS="Deaf Persons" OR TS="Deaf Person" OR TS="Hard of Hearing Persons" OR TS="Visually Impaired Person" OR TS="Blind Persons" OR TS="Blind Person" OR TS="Deaf-Blind") OR (TS="Persons with Mental Disabilities" OR TS="Disabled Persons" OR TS="Persons With Hearing Impairments" OR TS="Amputees" OR TS="Visually Impaired Persons" OR TS="Blindness") | 276518 |
| **4** | #1 and #2 and #3 | 4563 |
| **5** | TS=children | 3609926 |
| **6** | (#4) NOT #5 | 3291 |
| **7** | TI=(review) | 948219 |
| **8** | (#6) NOT #7 | 3222 |
| **9** | TS=(less than 65 years) | 51791 |
| **10** | (#8) NOT #9 | 3045 |
| **11** | TS=(middle age) | 5534603 |
| **12** | (#10) NOT #11 | 992 |
| **13** | (#12) and English or Chinese (languages) | 857 |
| **Database** | **CINAHL** | |
| **Set #** | Search Terms | Number |
| **1** | TI ( "elderly" OR "old" OR "Centenarians" OR "Octogenarians" OR "Frail Elders" OR "Aged" OR "Frail Elderly" OR “Older adults” ) OR AB ( "elderly" OR "old" OR "Centenarians" OR "Octogenarians" OR "Frail Elders" OR "Aged" OR "Frail Elderly" OR “Older adults” ) | 268580 |
| **2** | "TI ( “Care Demand*” OR “Health Demand*” OR “Nursing Demand*” OR “social Demand*” OR “Care need*” OR “Service need*” OR “Social need*” OR “Health need*” OR “Nursing need*” OR “unmet need*” OR “health priorit*” OR “Nursing priorit*” OR “Care priorit*” OR “requirement*” OR “Care support*” OR “Health support*” OR “Nursing support*” OR “social support*” OR “Care requirement*” OR “Health requirement*” OR “Nursing requirement*” OR “social requirement*” OR “Health Services Needs and Demand” OR “Craving” OR “Help-Seeking Behavior” ) OR AB ( “Care Demand*” OR “Health Demand*” OR “Nursing Demand*” OR “social Demand*” OR “Care need*” OR “Service need*” OR “Social need*” OR “Health need*” OR “Nursing need*” OR “unmet need*” OR “health priorit*” OR “Nursing priorit*” OR “Care priorit*” OR “requirement*” OR “Care support*” OR “Health support*” OR “Nursing support*” OR “social support*” OR “Care requirement*” OR “Health requirement*” OR “Nursing requirement*” OR “social requirement*” OR “Health Services Needs and Demand” OR “Craving” OR “Help-Seeking Behavior” ) | 47108 |
| **3** | TI ( ("Disabled Person" OR "Handicapped" OR "People with Disabilities" OR "People with Disability" OR "Persons with Disabilities" OR "Persons with Disability" OR "Physically Handicapped" OR "Physically Disabled" OR "Physically Challenged" OR "Intellectual Disability" OR "Mentally Retarded" OR "Hearing Impaired Persons" OR "Hearing Impaired Person" OR "Hearing Disabled" OR "Deaf Persons" OR "Deaf Person" OR "Hard of Hearing Persons" OR "Visually Impaired Person" OR "Blind Persons" OR "Blind Person" OR "Deaf-Blind") OR ("Persons with Mental Disabilities" OR "Disabled Persons" OR "Persons With Hearing Impairments" OR "Amputees" OR "Visually Impaired Persons" OR "Blindness") ) OR AB ( ("Disabled Person" OR "Handicapped" OR "People with Disabilities" OR "People with Disability" OR "Persons with Disabilities" OR "Persons with Disability" OR "Physically Handicapped" OR "Physically Disabled" OR "Physically Challenged" OR "Intellectual Disability" OR "Mentally Retarded" OR "Hearing Impaired Persons" OR "Hearing Impaired Person" OR "Hearing Disabled" OR "Deaf Persons" OR "Deaf Person" OR "Hard of Hearing Persons" OR "Visually Impaired Person" OR "Blind Persons" OR "Blind Person" OR "Deaf-Blind") OR ("Persons with Mental Disabilities" OR "Disabled Persons" OR "Persons With Hearing Impairments" OR "Amputees" OR "Visually Impaired Persons" OR "Blindness") | 10003 |
| **4** | #1 and #2 and #3 and #4 | 57 |
| **Database** | **Cochrane** | |
| **Set #** | Search Terms | Number |
| **1** | MeSH descriptor: [Centenarians] explode all trees | 0 |
| **#2** | MeSH descriptor: [Aged] explode all trees | 242328 |
| **#3** | MeSH descriptor: [Frail Elderly] explode all trees | 958 |
| **#4** | (elderly OR Centenarians OR Octogenarians OR old OR Frail Elders OR Older adults):ti,ab,kw | 123678 |
| **#5** | #1 OR #2 OR #3 OR #4 | 345469 |
| **#6** | MeSH descriptor: [Health Services Needs and Demand] explode all trees | 630 |
| **#7** | MeSH descriptor: [Craving] explode all trees | 597 |
| **#8** | MeSH descriptor: [Help-Seeking Behavior] explode all trees | 58 |
| **#9** | ((“Care Demand*” OR “Health Demand*” OR “Nursing Demand*” OR “social Demand*” OR “Care need*” OR “Service need*” OR “Social need*” OR “Health need*” OR “Nursing need*” OR “unmet need*” OR “health priorit*” OR “Nursing priorit*” OR “Care priorit*” OR “requirement*” OR “Care support*” OR “Health support*” OR “Nursing support*” OR “social support*” OR “Care requirement*” OR “Health requirement*” OR “Nursing requirement*” OR “social requirement*”)):ti,ab,kw | 27793 |
| **#10** | #6 OR #7 OR #8 OR #9 | 29343 |
| **#11** | MeSH descriptor: [Persons with Mental Disabilities] explode all trees | 70 |
| **#12** | MeSH descriptor: [Disabled Persons] explode all trees | 1504 |
| **#13** | MeSH descriptor: [Persons With Hearing Impairments] explode all trees | 67 |
| **#14** | MeSH descriptor: [Amputees] explode all trees | 144 |
| **#15** | MeSH descriptor: [Visually Impaired Persons] explode all trees | 99 |
| **#16** | MeSH descriptor: [Blindness] explode all trees | 316 |
| **#17** | ("Disabled Person" OR "Handicapped" OR "People with Disabilities" OR "People with Disability" OR "Persons with Disabilities" OR "Persons with Disability" OR "Physically Handicapped" OR "Physically Disabled" OR "Physically Challenged" OR "Intellectual Disability" OR "Mentally Retarded" OR "Hearing Impaired Persons" OR "Hearing Impaired Person" OR "Hearing Disabled" OR "Deaf Persons" OR "Deaf Person" OR "Hard of Hearing Persons" OR "Visually Impaired Person" OR "Blind Persons" OR "Blind Person" OR "Deaf-Blind") OR ("Persons with Mental Disabilities" OR "Disabled Persons" OR "Persons With Hearing Impairments" OR "Amputees" OR "Visually Impaired Persons" OR "Blindness"):ti,ab,kw | 16141 |
| **#18** | #11 OR #12 OR #13 OR #14 OR #15 OR #16 OR #17 | 16375 |
| **#19** | #5 AND #10 AND #18 | 79 |
| **#20** | English:la | 1877082 |
| **#21** | #19 AND #20 | 77 |

**Supplementary Table 2.** Basic characteristics of the included studies

|  | Authors | Year | Country | Study Type | | Participants | | | | Data source | Research Tools | Sampling Method |
| --- | --- | --- | --- | --- | --- | --- | --- | --- | --- | --- | --- | --- |
| Age | Condition under investigation | Characteristic（year/person） | Number |
| 1 | Chang et.al 19 | 2018 | China | Quantitative research | Cross-sectional study | ≥60 | ADL disability | Age（Mean ± SD）：72±8.6  Gender：Male，147；Female，170 | 317 | / | Self-developed questionnaire | / |
| 2 | Che et.al 20 | 2015 | China | Quantitative research | Cross-sectional study | / | Expert | / | / | / | Delphi Expert Consultation Questionnaire | / |
| 3 | Che et.al 46 | 2012 | China | Quantitative research | Retrospective study | ＞60 | Disability | Age：60-69 years old，204；70-79 years old，122；＞80 years old，20  Gender：Male，195；Female，151 | 346 | The second national sample survey of persons with disabilities unified questionnaire "rehabilitation needs of persons with disabilities questionnaire" | Secondary data | Stratified, multi-stage, whole-group probability proportional sampling |
| 4 | Shen et.al 47 | 2020 | China | Quantitative research | Cross-sectional study | ≥60 | ADL disability | Age：60-69 years old，26；70-79 years old，45；≥80 years old，49  Gender：Male，63；Female，57 | 120 | / | Self-developed questionnaire | Stratified random sampling |
| 5 | Chen et.al 48 | 2022 | China | Quantitative research | Cross-sectional study | ≥60 | ADL disability | Age（Mean ± SD）：75.91±9.39  Gender：Male，99；Female，99 | 198 | / | Self-developed questionnaire | / |
| 6 | Chen et.al 55 | 2019 | China | Quantitative research | Cross-sectional study | ≥60 | Mental disability | Age：60-64 years old，100；65-69 years old，126；≥70 years old，118  Gender：Male，192；Female，208 | 400 | / | Self-developed questionnaire | Stratified random sampling |
| 7 | Chen et.al 56 | 2016 | China | Quantitative research | Cross-sectional study | ≥60 | ADL disability | Age：60-69 years old，14；70-79 years old，20；80-89 years old，28；≥ 90 years old，10  Gender：Male，35；Female，37 | 72 | / | Self-developed questionnaire | Convenient sampling |
| 8 | Feng et.al 53 | 2015 | China | Quantitative research | Cross-sectional study | 60- 88 | Disability | Age：60-70 years old， 205；70-80 years old， 281；＞ 80 years old， 197；  Gender：Male， 383；Female，300 | 683 | / | Self-developed questionnaire | / |
| 9 | Gao et.al 21 | 2022 | China | Quantitative research | Cross-sectional study | / | Expert | / | / | / | Delphi Expert Consultation Questionnaire | / |
| 10 | Jiao 67 | 2015 | China | Quantitative research | Retrospective study | ＞60 | ADL disability | Gender：Male，3236；Female，4551 | 7787 | China Health and Retirement Longitudinal Study（2015） | Secondary Data | Sampling by probability proportion |
| 11 | Lai et.al 22 | 2021 | China | Qualitative research | Cross-sectional study | ≥60 | ADL disability | Gender：Male，7；Female，5 | 12 | / | Self-prepared interview outline | / |
| 12 | Li et.al 23 | 2022 | China | Quantitative research | Cross-sectional study | ≥60 | ADL disability | Age（Mean ± SD）：79.29±7.52  Gender：Male，46 ；Female， 54 | 100 | / | Self-developed questionnaire | / |
| 13 | Li et.al 54 | 2019 | China | Qualitative research | Cross-sectional study | ≥60 | ADL disability | Age：66-70 years old，1；71-75 years old，2；76-80 years old，2；＞80 years old，15  Gender：Male，3；Female，17 | 20 | / | Self-prepared interview outline | / |
| 14 | Li 24 | 2000 | China | Quantitative research | Cross-sectional study | 68-85 | Aphasia | Age（range）：68-85 years old  Gender：Male，20 ；Female， 32 | 52 | / | Self-developed questionnaire | / |
| 15 | Ling 68 | 2020 | China | Quantitative research | Cross-sectional study | ≥60 | ADL disability | Age：60-69 years old，33；70-79 years old，85；80-89 years old，136；90-98 years old，44  Gender：Male，112；Female，186 | 298 | / | Questionnaire on the needs of community support services for the disabled elderly designed by Wang et al | Convenient sampling |
| 16 | Liu et.al 25 | 2017 | China | Quantitative research | Cross-sectional study | ≥60 | ADL disability | Age（Mean ± SD）：74.63±8.54； 60 - 70 years old， 86 ；71 - 80 years old， 182；＞ 80 years old， 121  Gender：Male，187；Female，202 | 389 | / | Self-developed questionnaire | / |
| 17 | Liu et.al 69 | 2020 | China | Quantitative research | Cross-sectional study | ≥60 | ADL disability | Age：60-74 years old，126；75-89 years old，115；≥90 years old，10  Gender：Male，99；Female，152 | 285 | / | Self-developed questionnaire | / |
| 18 | Liu et.al 71 | 2022 | China | Quantitative research | Retrospective study | ≥60 | ADL disability | Gender：Male，622；female，1707  Age：80-89 years old，375；＞89- 99 years old，823；＞99 years old，1171 | 2369 | Chinese Longitudinal Healthy Longevity Survey (2018 ) | Secondary data | Random sampling |
| 19 | Wang 26 | 2021 | China | Quantitative research | Cross-sectional study | ≥60 | ADL disability | Age：60-69 years old，46；70-79 years old，64；80-89 years old，77；≥90 years old，17  Gender：Male， 84 ；female， 120 | 204 | / | Self-developed questionnaire | / |
| 20 | Wang et.al 57 | 2021 | China | Quantitative research | Cross-sectional study | ≥60 | ADL disability | / | 297 | / | Delphi Expert Consultation Questionnaire | / |
| 21 | Wang 43 | 2021 | China | Quantitative research | Cross-sectional study | ≥60 | ADL disability | Age（Mean）：75.12 ；60-70 years old，22；71 -80 years old，31；80 years old，14  Gender：Male，29 ；female，38 | 67 | / | Self-developed questionnaire | / |
| 22 | Wang et.al 27 | 2013 | China | Quantitative research | Cross-sectional study | ≥60 | ADL disability | Age（Mean ± SD）：78.8±7.4；60-69 years old，78；70-79 years old，282；80-89 years old，315；≥90 years old，53  Gender：Male， 444；female， 284 | 728 | / | Self-developed questionnaire | Multi-stage stratified whole-group sampling |
| 23 | Xie et.al 28 | 2018 | China | Quantitative research | Cross-sectional study | ≥80 | ADL disability | Age（Mean ± SD）：84.69±4.07  Gender：Male，57；female，73 | 130 | / | Self-developed questionnaire | Convenient sampling |
| 24 | Xu 29 | 2015 | China | Quantitative research | Cross-sectional study | ≥60 | ADL disability | Age：60-69 years old，94；70-79 years old，118；80-89 years old，71；≥90 years old，26；  Gender：Male，145；female，164 | 309 | / | Self-developed questionnaire | / |
| 25 | Zhang et.al 42 | 2020 | China | Quantitative research | Cross-sectional study | ≥60 | ADL disability | Age：60-69 years old，16；70-79 years old，49；80-89 years old，225；≥90 years old，62  Gender：Male，131；female，221 | 352 | / | Long-term care needs of the elderly with disabilities scale developed by Cao et al. | Random sampling |
| 26 | Zhang et.al 30 | 2021 | China | Qualitative research | Cross-sectional study | ≥60 | ADL disability | Age：60-69 years old，26；70-79 years old，52；≥80 years old，28  Gender：Male，70；female，62 | 132 | / | Long-term care needs of the elderly with disabilities scale developed by Cao et al. | Convenient sampling |
| 27 | Guo et.al 31 | 2017 | China | Quantitative research | Retrospective study | ≥60 | ADL disability | Gender：Male，221；female，338 | 559 | Statistical Information on the Monitoring of the Elderly Population and Aging Business in Shanghai in 2015 | Secondary data | Whole- group sampling |
| 28 | Zhang 52 | 2015 | China | Quantitative research | Cross-sectional study | ≥60 | ADL disability | Age：60-70 years old，168；71-80 years old，160；＞80 years old，70  Gender：Male，174；female，224 | 398 | / | Self-developed questionnaire | Multi-stage whole- Group sampling |
| 29 | Zhong 32 | 2022 | China | Quantitative research | Cross-sectional study | ≥60 | ADL disability | Age：60-64 years old，102；65-69 years old，107；70-74 years old，77；75-79 years old，45；≥80 years old，81  Gender：Male，242；female，170 | 412 | / | Long-term care needs of the elderly with disabilities scale developed by Cao et al. | Convenient sampling |
| 30 | Zhang et.al 33 | 2020 | China | Quantitative research | Cross-sectional study | ≥60 | ADL disability | / | 1000 | / | Self-developed questionnaire | Stratified Sampling |
| 31 | Zhu et.al 49 | 2019 | China | Quantitative research | Cross-sectional study | ≥60 | ADL disability | Age（Mean ± SD）：70.64+4.29  Gender：Male，85；female，65 | 150 | / | Self-developed questionnaire | / |
| 32 | Zuo et.al 58 | 2020 | China | Qualitative research | Cross-sectional study | ≥60 | Post-stroke disability | Age（Mean ± SD）：60-69 years old，6；70-79 years old，5；80-89 years old，4  Gender：Male，9；female，6 | 15 | / | Self-prepared interview outline | Purpose sampling |
| 33 | Zuo et.al 34 | 2020 | China | Quantitative research | Cross-sectional study | ≥60 | Post-stroke disability | Age：60-69 years old，132；70-79 years old，96；≥80 years old，73  Gender：Male， 179；female，122 | 301 | / | Questionnaire for specialized care needs of stroke patients at home | Convenient sampling |
| 34 | Alhusein et.al 72 | 2018 | Scotland | Qualitative research | Cross-sectional study | ≥60 | Sensation disorders（Visual or hearing disabilities） | Age（Mean ± SD）：81±8  Gender：Male，8；female，15 |  | / | Self-prepared interview outline | / |
| 35 | Allen et.al 63 | 1997 | America | Qualitative research | Cross-sectional study | ≥60 | ADL disability | Age：18-64 years old，318；≥65 years old，314  Gender：Male，235；female，397 | 632 | / | Self-prepared interview outline | Stratified sampling |
| 36 | Bien et.al 64 | 2013 | Six European countries (Germany, Greece, Italy, Poland, UK, and Sweden) | Quantitative research | Cross-sectional study | ≥65 | ADL disability | Age（Mean ± SD）：81.4±8.3  Gender：Male，1961；female，3962 | 5923 | EUROFAMCARE study | Secondary Data | / |
| 37 | Chen et.al 9 | 2021 | China | Quantitative research | Retrospective study | ≥60 | ADL disability | Age：60-74 years old，69；75-89 years old，538；≥90 years old，1093  Gender：Male，619；female，1081 | 1700 | Chinese Longitudinal Healthy Longevity Survey (2014 ) | Secondary Data | Random Sampling |
| 38 | Chen et.al 60 | 2018 | China | Quantitative research | Cross-sectional study | ≥60 | ADL disability | Age（Mean ± SD）：82.3±9.5  Gender：Male，138；female，165 | 303 | / | Barthel index (BI) and Functional Activites Questionnaire (FAQ) | / |
| 39 | Dubuc et.al 35 | 2011 | Canada | Quantitative research | Cross-sectional study | ≥75 | ADL disability | Age（Mean）：83  Gender：Male，280；female，466 | 746 | / | Short musculoskeletal function assessments (SMAF) |  |
| 40 | Harries et.al 70 | 1994 | England | Quantitative research | Cross-sectional study | ≥64 | Visual disability | / | 1660 | / | Self-developed questionnaire | Random sampling |
| 41 | Jiang et.al 36 | 2022 | China | Quantitative research | Retrospective study | ≥60 | ADL disability | Age（Mean）：69.52  Gender：Male，1578；female，1339 | 2917 | 2018 China Vulnerable Families Social Policy Support System Project | Secondary data | Multi-stage, split, equidistant and intentional combined sampling |
| 42 | Li 44 | 2006 | America | Quantitative research | Retrospective study | ≥65 | ADL disability | Age（Mean）：79.5 years  Gender：Male，78；female，200 | 278 | National Long Term Care Survey (1999) | Secondary data | Random Sampling |
| 43 | Momtaz et.al 61 | 2012 | Malaysia | Quantitative research | Retrospective study | ≥60 | ADL disability | Age：60-74 years old，164；75-84 years old，121；≥85 years old，52  Gender：Male，86；female，241 | 4002980 | Mental Health and Quality of Life of Older Malaysians（2003-2005） | Secondary data | Multi-stage proportional random sampling |
| 44 | Tang et.al 37 | 2022 | China | Quantitative research | Cross-sectional study | ≥60 | Disability | Age：60-69 years old，337；70-79 years old，121；≥80 years old，101  Gender：Male，313；female，246 | 559 | / | Self-developed questionnaire | Whole- group sampling |
| 45 | Turcotte 45 | 2015 | Canada | Qualitative research | Cross-sectional study | ≥65 | ADL disability | Age（Mean ± SD）：78±7  Gender：Male，6；female，5 | 11 | / | Self-prepared interview outline | / |
| 46 | Wu et.al 62 | 2021 | China | Qualitative research | Cross-sectional study | ≥65 | ADL disability | Age：60–69 years old，13；70–79 years old，35；80–89 years old，65；≥90 years old，26  Gender：Male，49；female，90 | 139 | / | Self-prepared interview outline | / |
| 47 | Ying et.al 59 | 2020 | China | Qualitative research | Cross-sectional study | ≥60 | Disability | Age：60–69 years old，5；70–79 years old，5；80–89 years old，5  Gender：Male，9；female，6 | 15 | / | Self-prepared interview outline | Purpose dampling |
| 48 | Yang et.al 73 | 2014 | China | Quantitative research | Retrospective study | ≥60 | Mental disability (including multiple disabilities) | / | 60 | Survey on Social Security and Service System for Rural People with Disabilities in Northeast China （2011） | Secondary data | Whole- group sampling |
| 49 | Xu 65 | 2018 | China | 24-hour video observation | Case | 78 | Post-stroke disability | Age：78 years old，1；72 years old，1  Gender：Male，1；female，1 | 1 | / | Video recording | Purpose sampling |
| 50 | Kong et.al 38 | 2020 | China | Mixed study | Cross-sectional study | ≥60 | Disability | Age：60-79 years old，93；≥80 years old，11  Gender：Male，66；female，38 | 104 | / | Self-prepared interview syllabi/ Self-developed questionnaire | Stratified multi-stage regional sampling method |
| 51 | Liu 39 | 2010 | China | Quantitative research | Cross-sectional study | ＞60 | Intellectual disability | / | 132 | / | Self-developed questionnaire | Convenient sampling |
| 52 | Anderson et.al 66 | 2015 | America | Quantitative research | Retrospective study | ≥65 | ADL disability | Age：65-74 years old，439；75-84 years old，649；85 years old， 993  Gender：Male，1455；female，626 | 2081 | National Long Term Care Survey (2004) | Secondary data | / |
| 53 | Bennion et.al 40 | 2013 | England | Qualitative research | Cross-sectional study | 61-93 | Hearing disability | Age (range) ：61-93  Gender：Male，3；female，6 | 9 | / | Self-prepared interview outline | Purpose sampling |
| 54 | Zhang et.al 41 | 2022 | China | Qualitative research | Cross-sectional study | ＞60 | Disability | Age：60-69 years old，18；70-79 years old，26；80-89 years old，44；≥90 years old，30  Gender：Male，59 ；female，59 | 118 | / | Self-developed questionnaire | Stratified proportional sampling method |
| 55 | Okamoto 50 | 1997 | Japan | Quantitative research | Retrospective study | ≥65 | Disability | / | 836000 | National Household Survey and Free-standing Visiting Nursing Stations | Secondary data |  |
| 56 | Kietzman et.al 51 | 2012 | America | Qualitative research | Cross-sectional study | ≥65 | Disability | Age (range) M ： 75 (65–90 years)  Gender：Male，49；female，26 | 33 | / | Self-prepared interview outline | Purpose sampling |
